# Supplementary material
Source: PubMed Central journal article supplement (PMC2859110)

C.

DMSO

PHA-781089

GCA

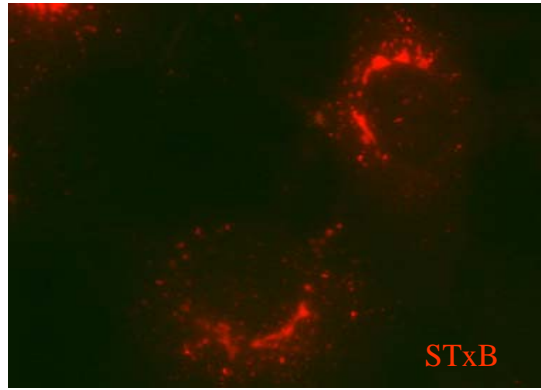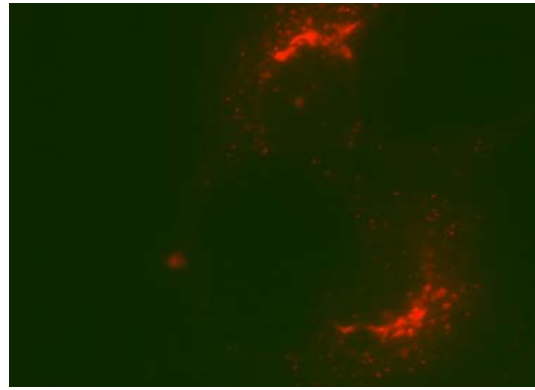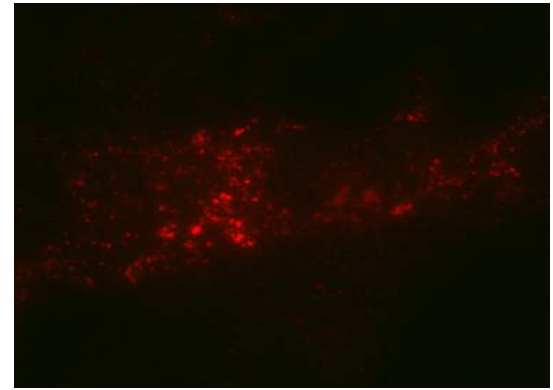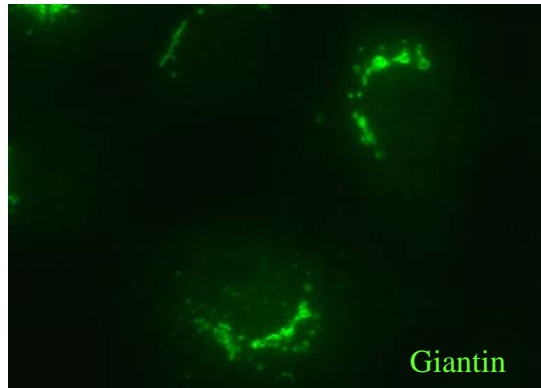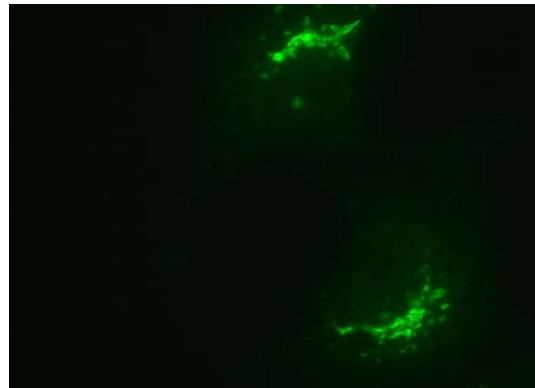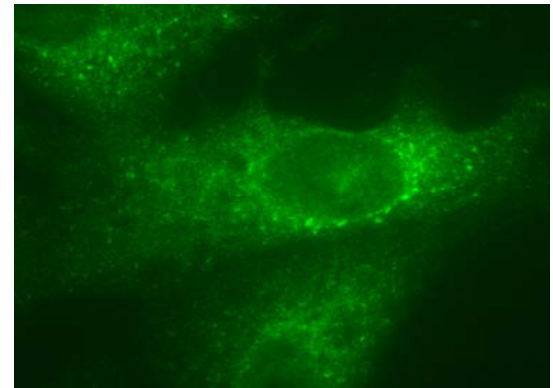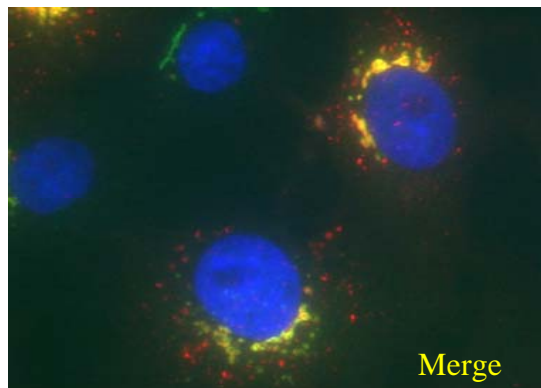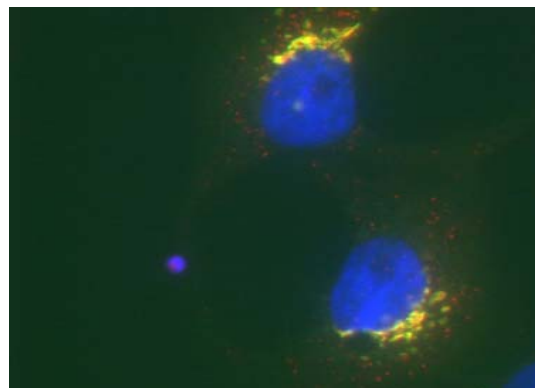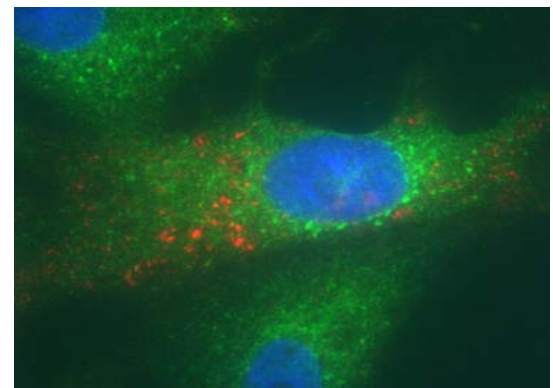

Supplement: NIHMS185006-supplement-supp_fig_05c.pdf [file NIHMS185006-supplement-supp_fig_05c.pdf]
